# Supplementary material
Source: PubMed Central journal article supplement (PMC3129219)
Supplement: supp_M111.234278_jbc.M111.234278-1.pdf [file supp_M111.234278_jbc.M111.234278-1.pdf]

Figure S1

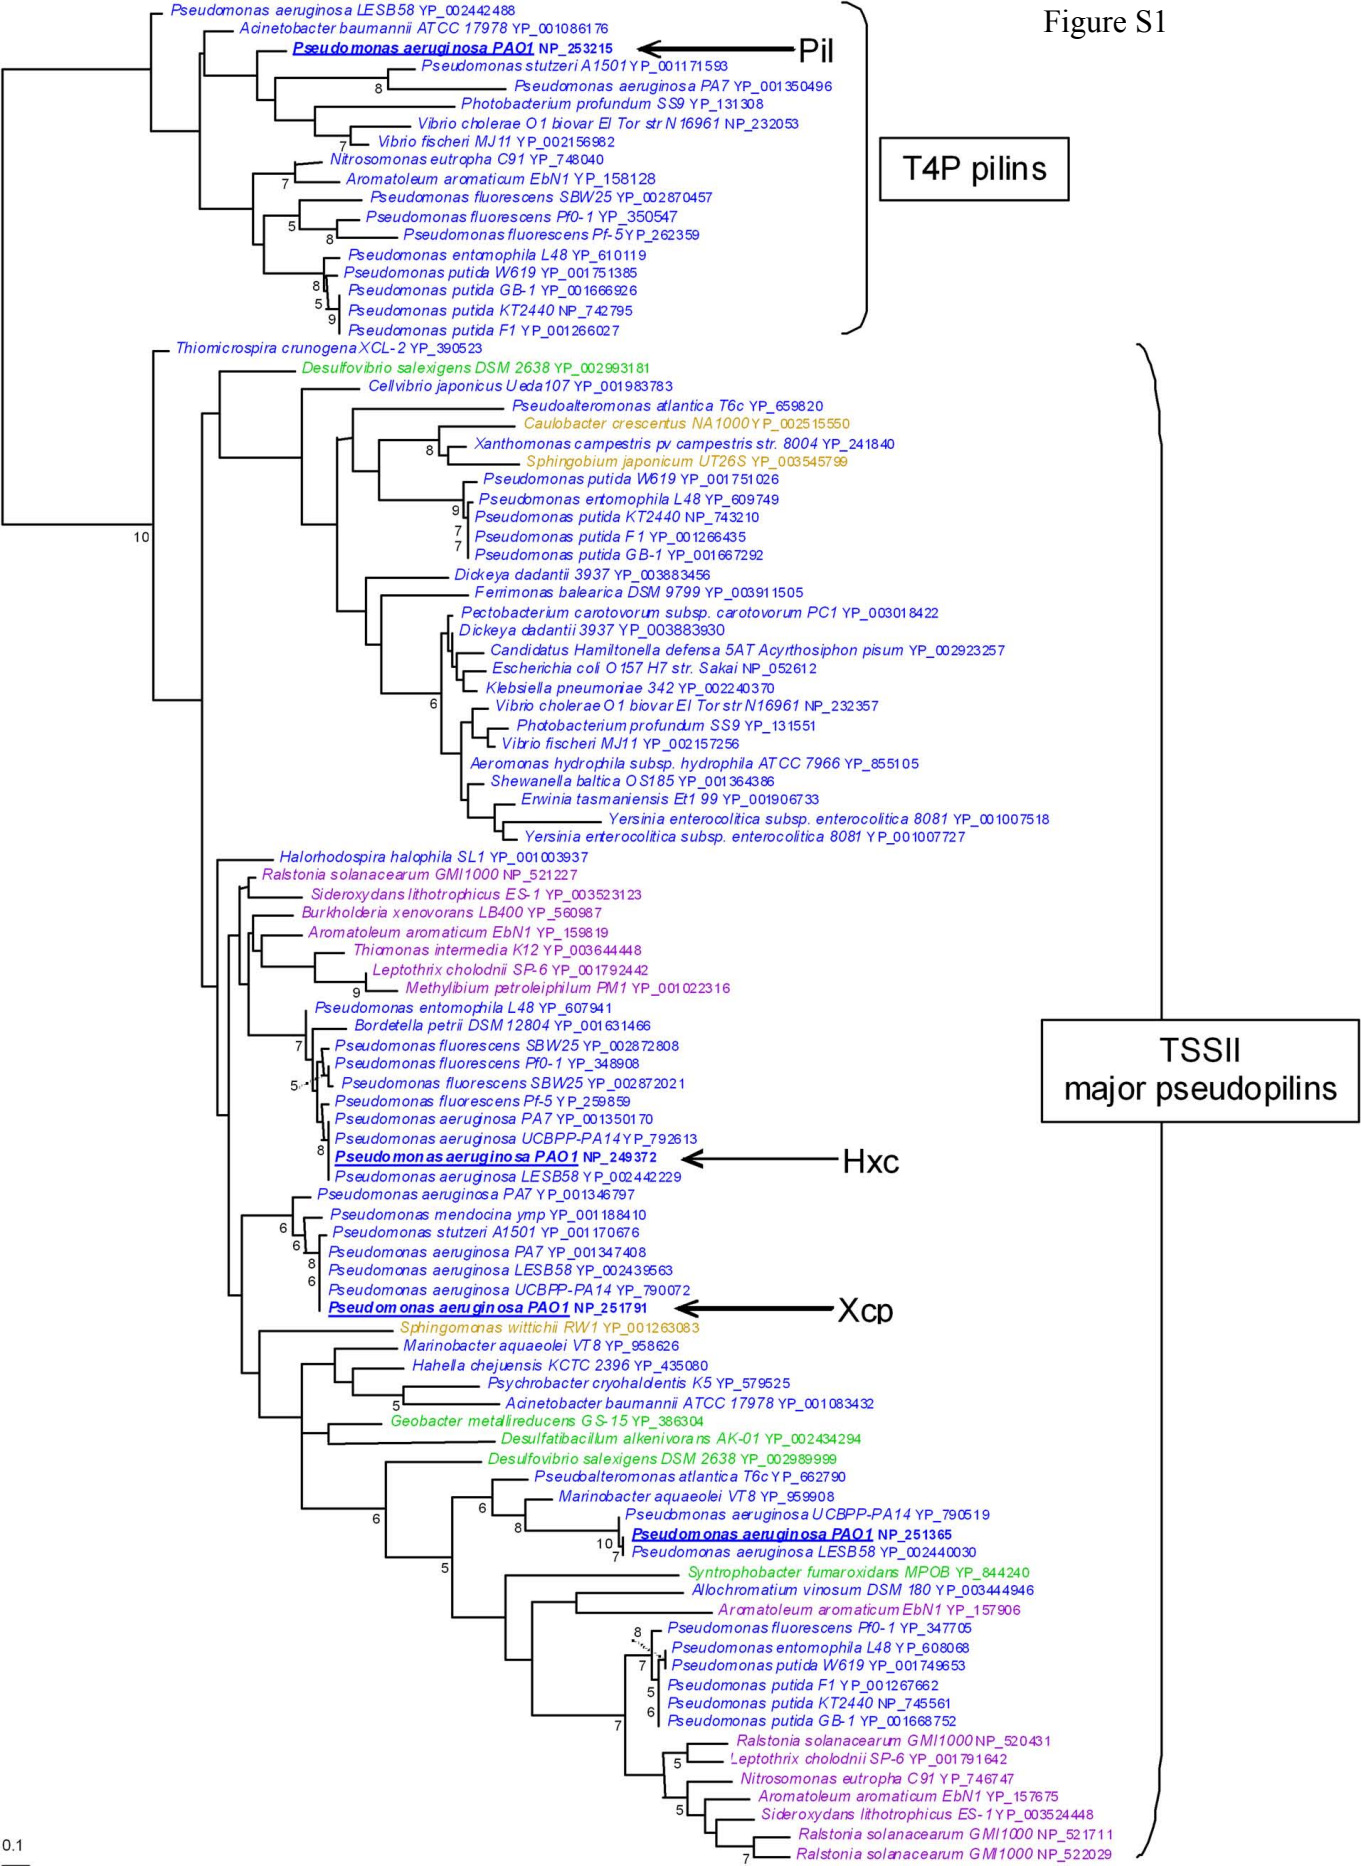

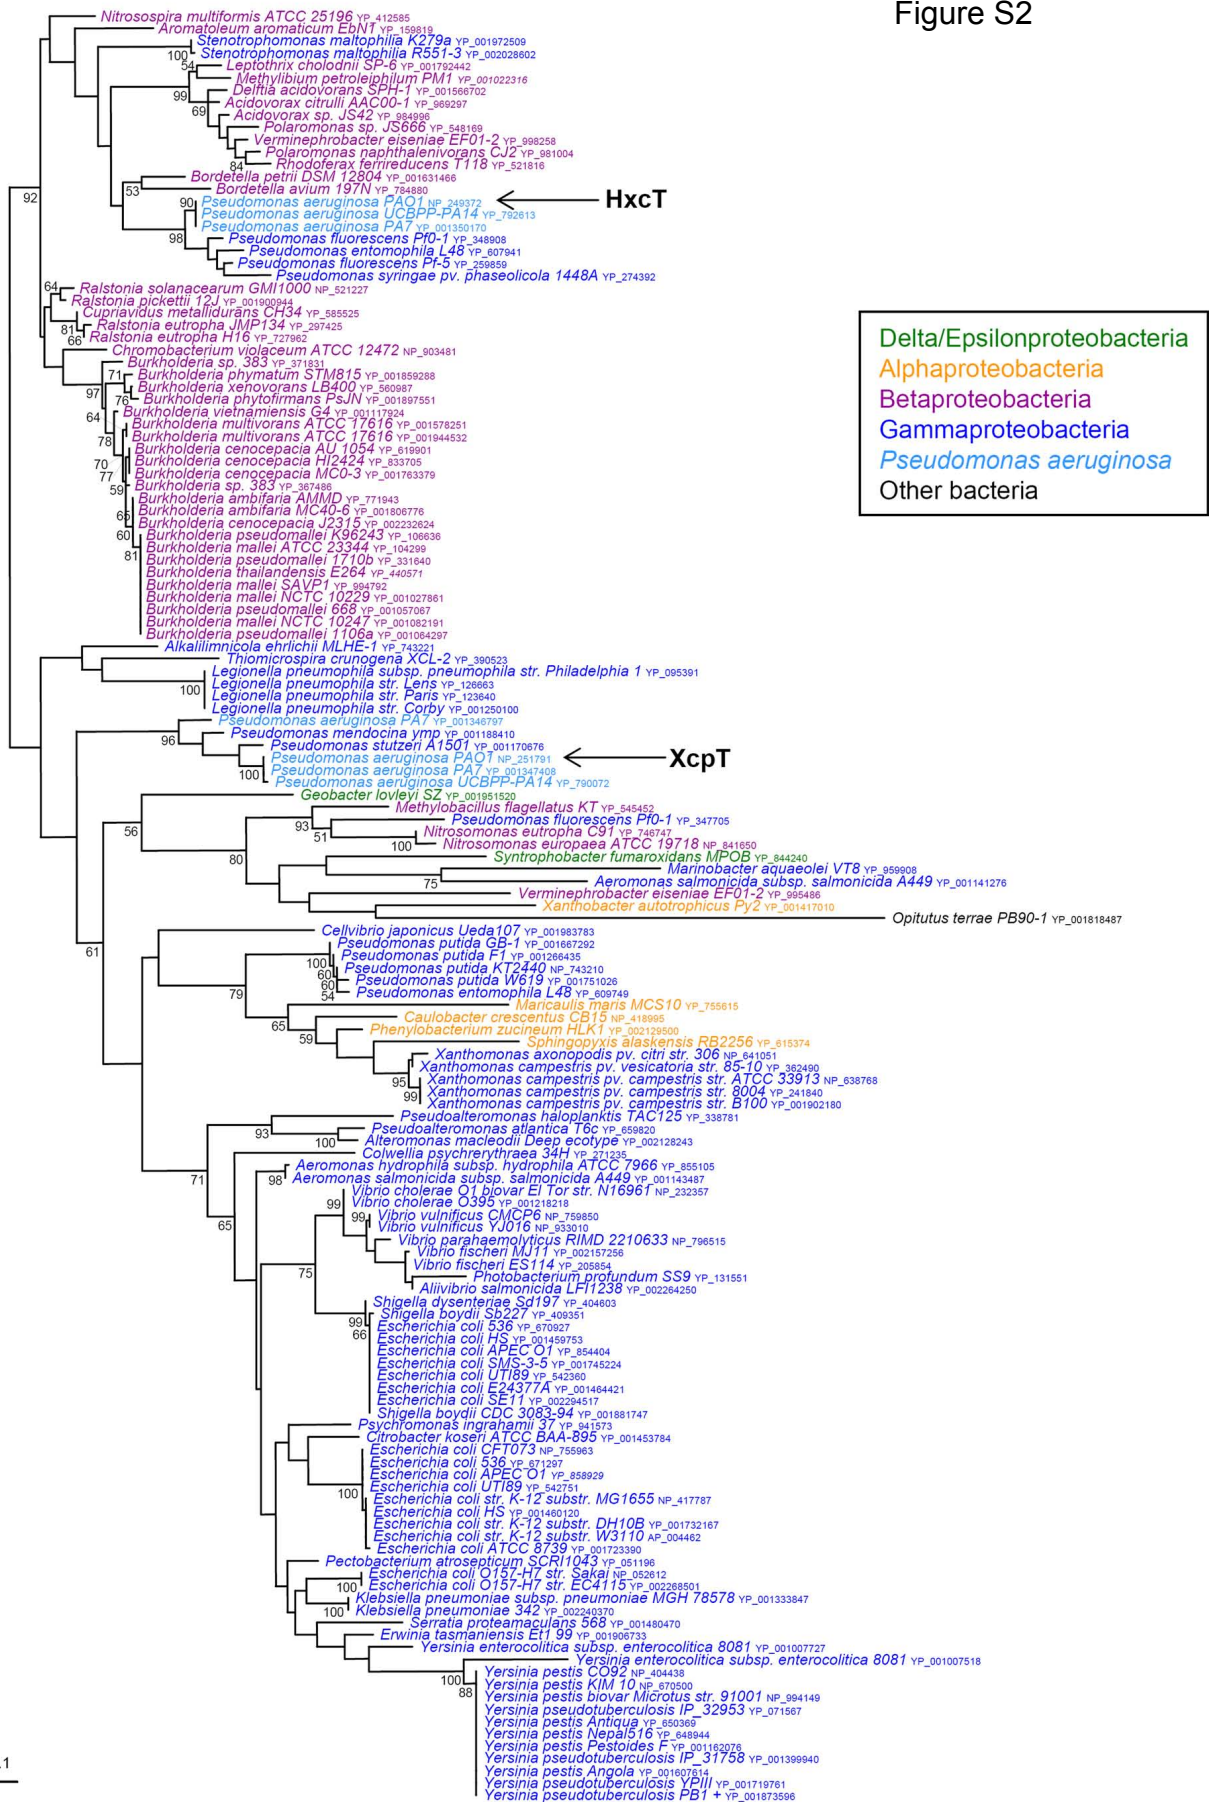



Figure S3B

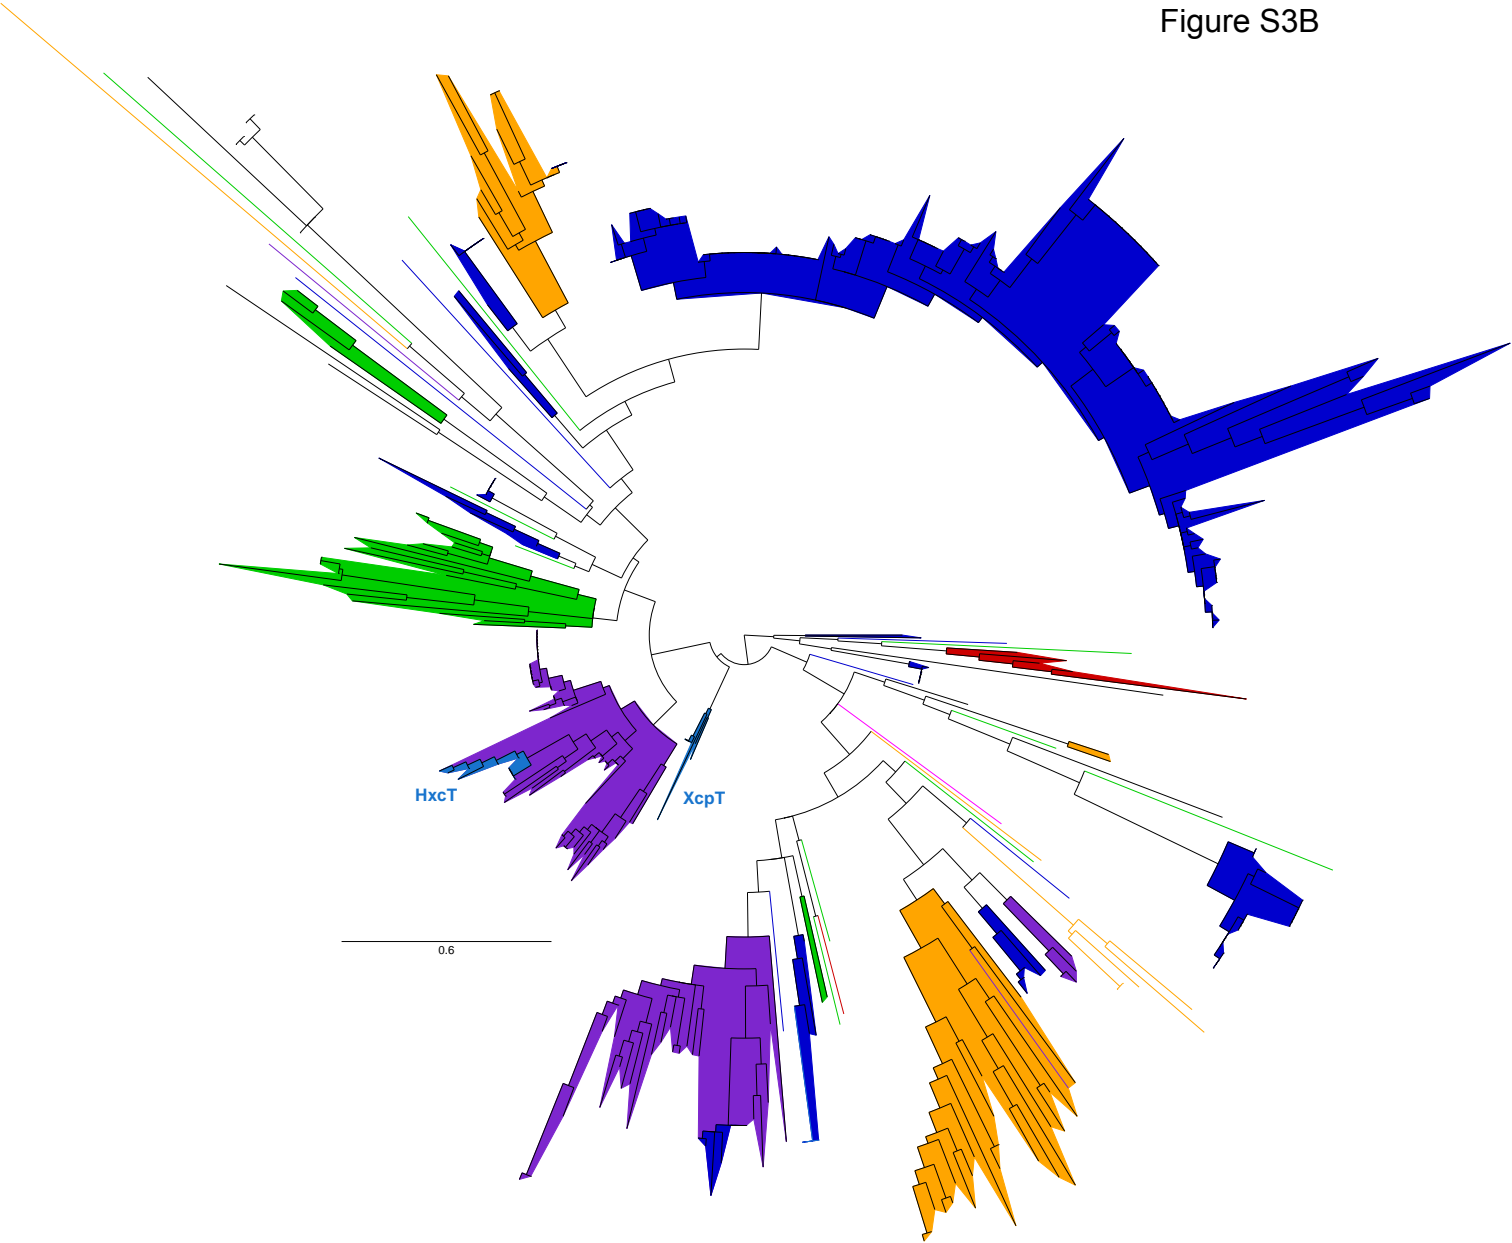

**Figure S1. Maximum Likelihood phylogenetic tree based on the D1 dataset (99 sequences, 57 positions).** The topology of the tree shows that T4P pilins and T2SS major pseudopilins represent two distinct homologous families. Number at nodes represent bootstrap values (only value > 50% are shown). The scale bar represents 0.1 substitutions per site. Gammaproteobacteria are in dark blue, Betaproteobacteria in purple, Alphaproteobacteria in yellow and Deltaproteobacteria in green. Sequences from *P. aeruginosa* PAO1 are underlined.

**Figure S2. Maximum likelihood phylogenetic tree based on the D2 dataset (145 sequences, 114 positions).** The taxonomic affiliation of each sequence is indicated by a colour code (see box for details). *Pseudomonas aeruginosa* PAO1 XcpT and HxcT are indicated by arrows. Numbers at branches represent bootstrap values (only value > 50% are shown). The scale bar represents the estimated average number of substitutions per site.

**Figure S3. Maximum likelihood phylogenetic trees (A & B) based on the D3 dataset (397 sequences, 69 positions).** Taxonomic groups are indicated by colours: green = Delta/Epsilonproteobacteria, purple = Betaproteobacteria, dark blue = Gammaproteobacteria, light blue = cluster of Gammaproteobacteria containing *Pseudomonas aeruginosa* PAO1 sequences, yellow = Alphaproteobacteria, pink = Firmicutes, red = Aquificae, black = Other bacteria). The scale bar represents the inferred average number of substitution per site.

Table S1: Nomenclature of the HxcT variants

| Name        | Mutation (HxcT-number-XcpT)                            |
|-------------|--------------------------------------------------------|
| HxcTmut2    | K23Q; E84K                                             |
| HxcTmut3    | K23Q; E84K; S77K                                       |
| HxcTmut4    | K23Q; E84K; S77K; N123D                                |
| HxcTmut5    | K23Q; E84K; S77K; N123D; K48D                          |
| HxcTmut6    | K23Q; E84K; S77K; N123D; K48D; P117E                   |
| HxcTmut7    | K23Q; E84K; S77K; N123D; K48D; P117E; K93N             |
| HxcTmut8    | K23Q; E84K; S77K; N123D; K48D; P117E; K93N; K65E       |
| HxcTmut9    | K23Q; E84K; S77K; N123D; K48D; P117E; K93N; K65E; E69K |
| HxcTmut6Δn5 | K23Q; E84K; S77K; N123D; P117E                         |
| HxcTn5      | K48D                                                   |

Table S2: Mutations and corresponding primers

| Name | Mutation | Primer name                                    | Primer sequence                                                                                                 |
|------|----------|------------------------------------------------|-----------------------------------------------------------------------------------------------------------------|
| n1   | K23Q     | <i>hxcTK23Q</i> -for<br><i>hxcTK23Q</i> -rev   | 5'-gccgcatgtgtccccaggtctcgaccgtcccgaccaggcccc-3'<br>5'-gtcgggacggctcgagcacctgggcaccaccatcgcgggcaggatc-3'        |
| n2   | E84K     | <i>hxcTE84K</i> -for<br><i>hxcTE84K</i> -rev   | 5'-aactgcgctcgtactaagcgcctccaacgacctgggcaagc-3'<br>5'-ggggtcgtggcaggcgcttcaggtacgagcgccagttctcgcgaggc-3'        |
| n3   | S77K     | <i>hxcTS77K</i> -for<br><i>hxcTS77K</i> -rev   | 5'-cctcagatcctcggcgaagaactgcgctcgtacctgagcgcctc-3'<br>5'-caggtacgagcgccagttctcgcgaggcatcggcaggggcgctccg-3'      |
| n4   | N123D    | <i>hxcTN123D</i> -for<br><i>hxcTN123D</i> -rev | 5'-ccgggcgggcaggggcatcgaccgacatcggtcctcagctct-3'<br>5'-ccaggagccgattcggcgtcgatccctcgcgcccggctcccgtc-3'          |
| n5   | K48D     | <i>hxcTK48D</i> -for<br><i>hxcTK48D</i> -rev   | 5'-gggctatcaggcgctcgacctaccgcctcgaccaggggcgc-3'<br>5'-ctgtcgaggcggtagaggctcgagcgctcatcagccggagattc-3'           |
| n6   | P117E    | <i>hxcTP117E</i> -for<br><i>hxcTP117E</i> -rev | 5'-ctcggcgccgacgggcaggaggggcgaggggcatcaacgcccagatcg-3'<br>5'-gttatccctcgcccccctcctcccgtcggcgccgagggagaaacagc-3' |
| n7   | K93N     | <i>hxcTK93N</i> -for<br><i>hxcTK93N</i> -rev   | 5'-ccaacgaccctgggcaaccctaccagtacctaatcccggc-3'<br>5'-attcaggtactgtaggggtccccaggggtcgtggcaggcgc-3'               |
| n8   | K65E     | <i>hxcTK65E</i> -for<br><i>hxcTK65E</i> -rev   | 5'-agcaggcgaggcggcgttaggtctcgcggagcgcctccgac-3'<br>5'-agggcgctccgcgagcacctcaagccctgcctgctcgatagc-3'             |
| n9   | E69K     | <i>hxcTE69K</i> -for<br><i>hxcTE69K</i> -rev   | 5'-ggettaaggtctcgaagcgcctccgatcctcggcgagc-3'<br>5'-cgaggcatcggcaggcgcttcgcgagcacctcaagccctcgc-3'                |

Table S3: Vectors and Plasmids

| Name                        | Description                                                                                                              | Reference  |
|-----------------------------|--------------------------------------------------------------------------------------------------------------------------|------------|
| pCR2.1                      | ColE1, fl <i>ori</i> , Ap <sup>R</sup> , Km <sup>R</sup>                                                                 | Invitrogen |
| pMMB190                     | Ap <sup>R</sup> , pMM66EH, <i>tac</i> promoter, <i>lacZ</i> $\alpha$                                                     | (1)        |
| pJN105                      | Gm <sup>R</sup> , <i>araC</i> -pBAD, (broad-host-range vector)                                                           | (2)        |
| pKNG101                     | Sm <sup>R</sup> , <i>mobRK2</i> , <i>sacBR</i> <sup>+</sup> (suicide vector)                                             | (3)        |
| pRK2013                     | Km <sup>R</sup> , ColE1, Tra+ Mob+ (RK2)                                                                                 | (4)        |
| pET22b                      | <i>pelB</i> , T7 lac, Ap <sup>R</sup> , pBR322 <i>ori</i>                                                                | Novagen    |
| pETG-22b                    | <i>pelB</i> , T7 lac, Ap <sup>R</sup> , pBR322 <i>ori</i> , C-ter his6-tag, gateway site added for recombination cloning | (5)        |
| pKNG $\Delta$ <i>hxcT</i>   | <i>Bam</i> HI/ <i>Apa</i> I 1000bp DNA fragment carrying <i>hxcV'</i> - <i>HxcX'</i> into the pKNG84, Sm <sup>R</sup>    | This work  |
| pCR2.1- <i>hxcT</i> wt      | 0.6 kb DNA fragment containing <i>hxcT</i> wild type cloned into pCR2.1                                                  | (6)        |
| pMMB-XcpT                   | <i>Eco</i> RI DNA fragment carrying the <i>xcpT</i> gene cloned into the pMMB190, under the <i>tac</i> promoter          | (7)        |
| pMMB-XcpT <sup>H</sup>      | <i>Bam</i> HI/ <i>Hind</i> III DNA fragment carrying the <i>xcpT(His6)</i> gene cloned into the pMMB190                  | (8)        |
| pMMB-HxcT                   | <i>Eco</i> RI DNA fragment containing <i>hxcT</i> wild type cloned in pMMB190                                            | This work  |
| pMMB-HxcT <sup>H</sup>      | <i>Bam</i> HI/ <i>Hind</i> III DNA fragment carrying the <i>hxcT(His6)</i> wild type gene cloned into the pMMB190        | This work  |
| pMMB-HxcTmut2               | <i>Eco</i> RV- <i>Bam</i> HI DNA fragment carrying the <i>hxcTmut2</i> gene cloned into the pMMB190                      | This work  |
| pMMB-HxcT <sup>H</sup> mut2 | <i>Bam</i> HI/ <i>Hind</i> III DNA fragment carrying the <i>hxcT(His6)mut2</i> gene cloned into the pMMB190              | This work  |
| pMMB-HxcTmut3               | <i>Eco</i> RV- <i>Bam</i> HI DNA fragment carrying the <i>hxcTmut3</i> gene cloned into the pMMB190                      | This work  |
| pMMB-HxcT <sup>H</sup> mut3 | <i>Bam</i> HI/ <i>Hind</i> III DNA fragment carrying the <i>hxcT(His6)mut3</i> gene cloned into the pMMB190              | This work  |
| pMMB-HxcTmut4               | <i>Eco</i> RV- <i>Bam</i> HI DNA fragment carrying the <i>hxcTmut4</i> gene cloned into the pMMB190                      | This work  |
| pMMB-HxcT <sup>H</sup> mut4 | <i>Bam</i> HI/ <i>Hind</i> III DNA fragment carrying the <i>hxcT(His6)mut4</i> gene cloned into the pMMB190              | This work  |
| pMMB-HxcTmut5               | <i>Eco</i> RV- <i>Bam</i> HI DNA fragment carrying the <i>hxcTmut5</i> gene cloned into the pMMB190                      | This work  |
| pMMB-HxcT <sup>H</sup> mut5 | <i>Bam</i> HI/ <i>Hind</i> III DNA fragment carrying the <i>hxcT(His6)mut5</i> gene cloned into the pMMB190              | This work  |
| pMMB-HxcTmut6               | <i>Eco</i> RV- <i>Bam</i> HI DNA fragment carrying the <i>hxcTmut6</i> gene cloned into the pMMB190                      | This work  |
| pMMB-HxcT <sup>H</sup> mut6 | <i>Bam</i> HI/ <i>Hind</i> III DNA fragment carrying the <i>hxcT(His6)mut6</i> gene cloned into the pMMB190              | This work  |
| pMMB-HxcTmut7               | <i>Eco</i> RV- <i>Bam</i> HI DNA fragment carrying the <i>hxcTmut7</i> gene cloned into the pMMB190                      | This work  |
| pMMB-HxcT <sup>H</sup> mut7 | <i>Bam</i> HI/ <i>Hind</i> III DNA fragment carrying the <i>hxcT(His6)mut7</i> gene cloned into the pMMB190              | This work  |
| pMMB-HxcTmut8               | <i>Eco</i> RV- <i>Bam</i> HI DNA fragment carrying the <i>hxcTmut8</i> gene cloned into the pMMB190                      | This work  |
| pMMB-HxcT <sup>H</sup> mut8 | <i>Bam</i> HI/ <i>Hind</i> III DNA fragment carrying the <i>hxcT(His6)mut8</i> gene cloned into the pMMB190              | This work  |
| pMMB-HxcTmut9               | <i>Eco</i> RV- <i>Bam</i> HI DNA fragment carrying the <i>hxcTmut9</i> gene cloned into the pMMB190                      | This work  |

|                                |                                                                                                                                                                         |           |
|--------------------------------|-------------------------------------------------------------------------------------------------------------------------------------------------------------------------|-----------|
| pMMB-HxcT <sup>H</sup> mut9    | <i>Bam</i> HI/ <i>Hind</i> III DNA fragment carrying the <i>hxcT(His6)mut9</i> gene cloned into the pMMB190                                                             | This work |
| pMMB-HxcTmut6Δn5               | <i>Eco</i> RV- <i>Bam</i> HI DNA fragment carrying the <i>hxcTmut6Δn5</i> gene cloned into the pMMB190                                                                  | This work |
| pMMB-HxcT <sup>H</sup> mut6Δn5 | <i>Bam</i> HI/ <i>Hind</i> III DNA fragment carrying the <i>hxcT(His6)mut6Δn5</i> gene cloned into the pMMB190                                                          | This work |
| pMMB-HxcTn5                    | <i>Eco</i> RV- <i>Bam</i> HI DNA fragment carrying the <i>hxcTn5</i> gene cloned into the pMMB190                                                                       | This work |
| pMMB-HxcT <sup>H</sup> n5      | <i>Bam</i> HI/ <i>Hind</i> III DNA fragment carrying the <i>hxcT(His6)n5</i> gene cloned into the pMMB190                                                               | This work |
| pMMB-HxcTPf                    | <i>Eco</i> RI DNA fragment carrying the <i>P. fluorescens</i> PF-5 <i>hxcT</i> gene cloned into pMMB190                                                                 | This work |
| pJN-XcpT                       | <i>Xba</i> I/ <i>Sac</i> I DNA fragment carrying the <i>xcpT</i> gene cloned into the pJN105                                                                            | This work |
| pJN-HxcT                       | <i>Xba</i> I/ <i>Sac</i> I DNA fragment carrying the <i>hxcT</i> wild type gene cloned into the pJN105                                                                  | This work |
| pJN-HxcTmut5                   | <i>Xba</i> I/ <i>Sac</i> I DNA fragment carrying the <i>hxcTmut5</i> gene cloned into the pJN105                                                                        | This work |
| pET-XcpTp <sub>NH</sub>        | <i>Bam</i> HI/ <i>Hind</i> III 500bp DNA fragment coding for the soluble domain of XcpT with a N-ter his6 tag, fused to the PelB leader peptide, cloned into the pET22b | (8)       |
| pET-22b-HxcTp                  | attR1/attR2 987bp coding for the soluble domain of HxcT with a N-ter TEV protease cleavage site and a his6-tag, fused to the pelB cloned into the pET-22b               | This work |

Sm, streptomycin Ap, ampicilin; Gm, gentamicin; Km, kanamycin



Table S4: Strains

| Name                        | Description                                                                                         | Reference             |
|-----------------------------|-----------------------------------------------------------------------------------------------------|-----------------------|
| <b><i>E. coli</i></b>       |                                                                                                     |                       |
| TG1                         | <i>SupEΔ(lac-proAB)thi hsdRΔ5 (F' :traD36 rpoA<sup>+</sup>B<sup>+</sup>lacI<sup>q</sup>ZAM15)</i>   | Laboratory Collection |
| BL21(DE3)                   | <i>hsdS gal (1 cIts857 ind1 Sam7 nin5 lacUV5-T7 gene1)</i>                                          | Invitrogen            |
| CC118λpir                   | <i>Δ(ara-leu) araD ΔlacX74 galE galK phoA20 thi-1 rpsE rpoB argE(Am) recA1 Rf<sup>R</sup>(λpir)</i> | (9)                   |
| <b><i>P. aeruginosa</i></b> |                                                                                                     |                       |
| PAO1                        | Prototrophe, chl-2                                                                                  | B. Holloway           |
| <i>ΔxcpT</i>                | Chromosomal <i>xcpT</i> deletion in PAO1                                                            | Laboratory collection |
| <i>ΔxcpTΔhxcT</i>           | Chromosomal <i>xcpT</i> and <i>hxcT</i> deletion in PAO1                                            | This work             |

## REFERENCES

- Morales, V. M., Backman, A., and Bagdasarian, M. (1991) *Gene* **97**(1), 39-47
- Newman, J. R., and Fuqua, C. (1999) *Gene* **227**(2), 197-203
- Kagami, Y., Ratliff, M., Surber, M., Martinez, A., and Nunn, D. N. (1998) *Mol Microbiol* **27**(1), 221-233
- Figurski, D. H., and Helinski, D. R. (1979) *Proc Natl Acad Sci U S A* **76**(4), 1648-1652
- Veesler, D., Blangy, S., Siponen, M., Vincentelli, R., Cambillau, C., and Sciara, G. (2009) *Anal Biochem* **388**(1), 115-121
- Ball, G., Durand, E., Lazdunski, A., and Filloux, A. (2002) *Mol Microbiol* **43**(2), 475-485
- Durand, E., Bernadac, A., Ball, G., Lazdunski, A., Sturgis, J. N., and Filloux, A. (2003) *J Bacteriol* **185**(9), 2749-2758
- Durand, E., Michel, G., Voulhoux, R., Kurner, J., Bernadac, A., and Filloux, A. (2005) *J Biol Chem* **280**(36), 31378-31389
- Herrero, M., de Lorenzo, V., and Timmis, K. N. (1990) *J Bacteriol* **172**(11), 6557-6567
